# Supplementary material
Source: Springer Nature journal article supplement (https://www.springermedizin.de/resource/supplementary/13058_2011_2938_MOESM10_ESM.pdf/9702934)

Title: Regulation of Actin Cytoskeleton

Organism: Homo sapiens

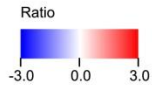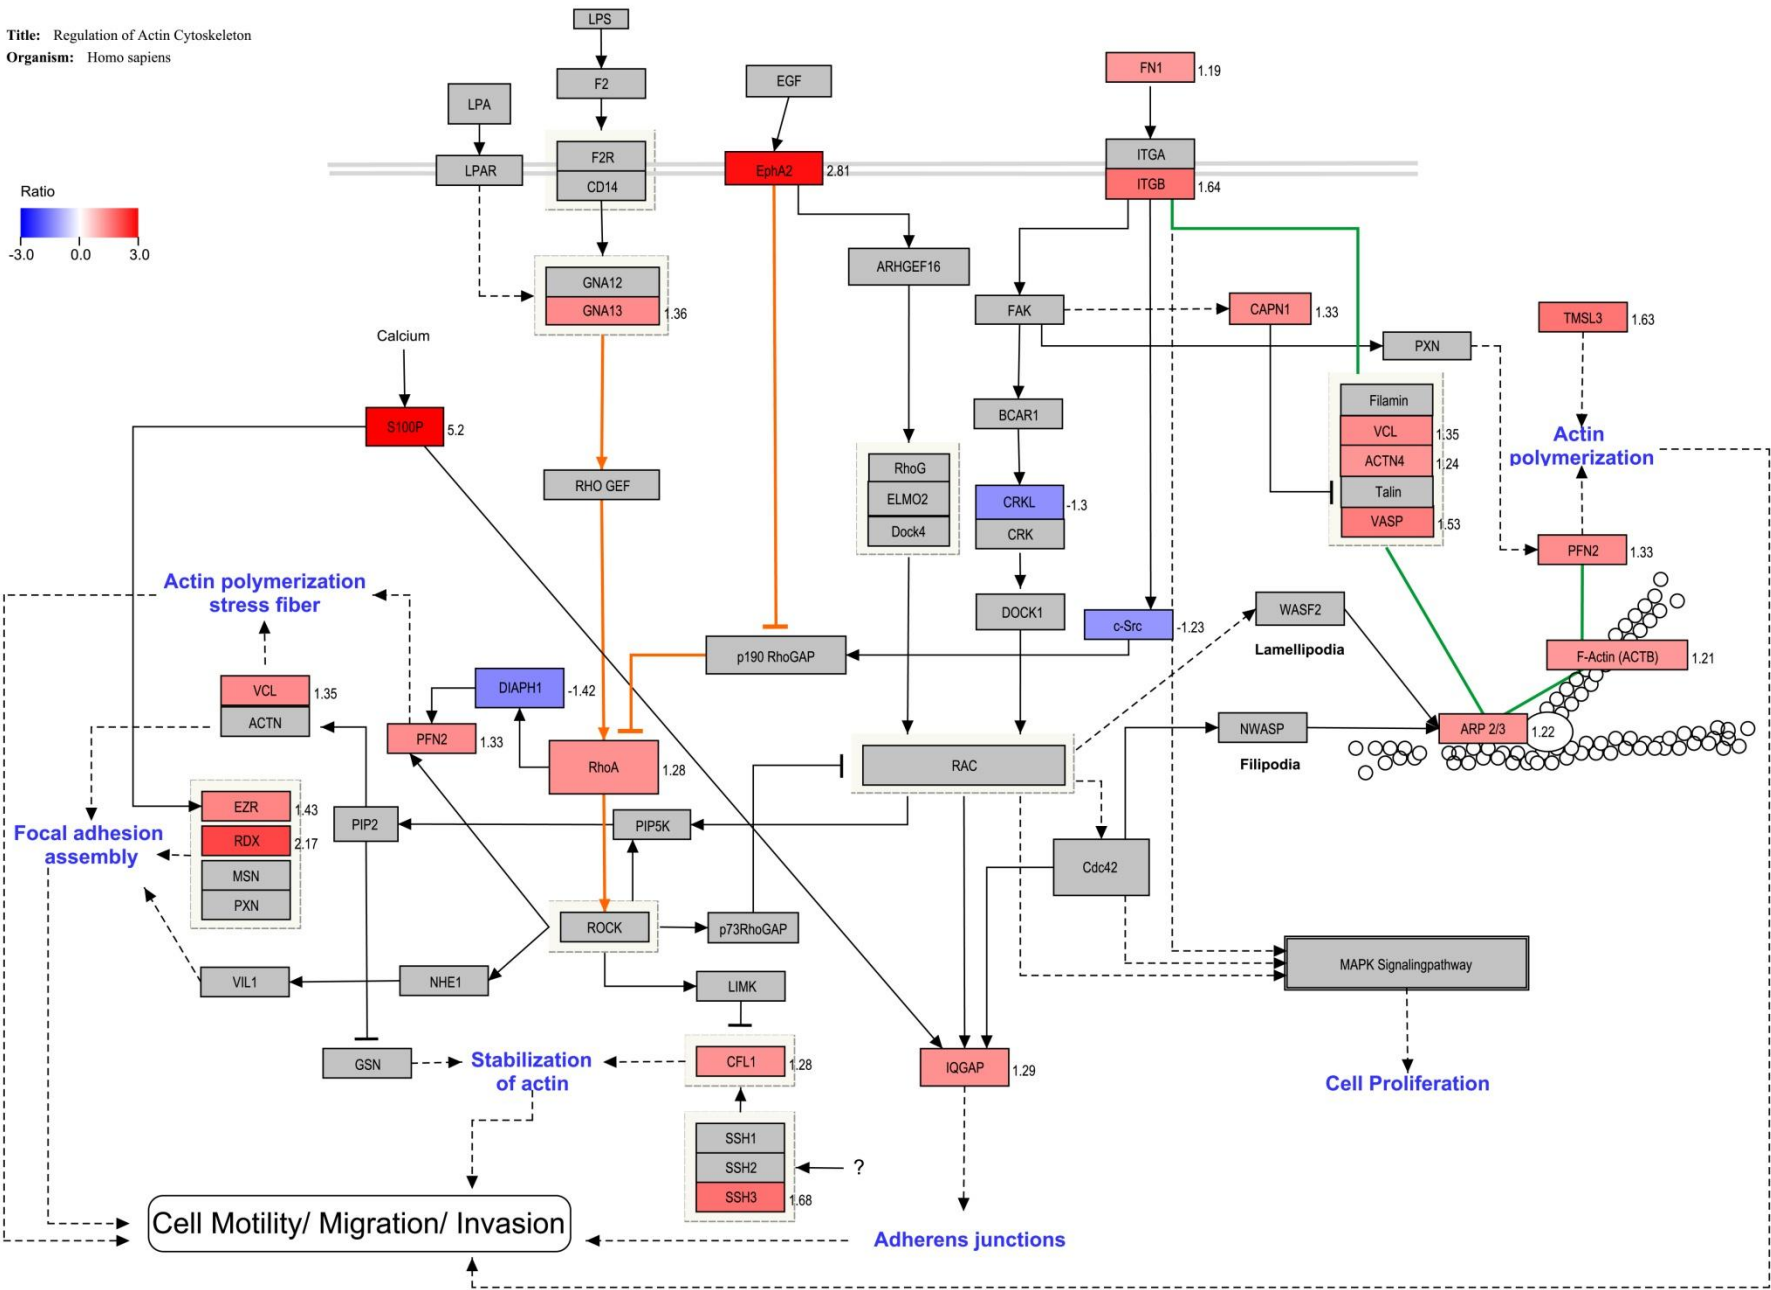

Supplement: MOESM10 [file 9702934]
